# Supplementary material for: Differentiation and Distribution of Marrow Stem Cells in Flex-Flow Environments Demonstrate Support of the Valvular Phenotype
Source: PubMed Central journal article supplement (PMC4633293; doi:10.1371/journal.pone.0141802), 2015-11-04
Supplement: pone.0141802.s003.pdf [file pone.0141802.s003.pdf]

# Purity of RNA

# Static RNA - DNA Report

Report time 2/4/2014 11:40:05 AM  
Batch name C:\Documents and  
Settings\vbhar002\Desktop\2\_4\_14\_SR\_AV.BDN  
Application RNA - DNA Estimation 3.00(184)  
Operator

## Instrument Settings

Instrument Cary 300  
Instrument version no. 9.00  
Ordinate Mode Abs  
SBW (nm) 2.0  
Ave Time (sec) 1.000  
Beam mode Double auto select  
Beam interchange Normal  
Replicates OFF  
Wavelength 1 (nm) 260.00  
Wavelength 2 (nm) 280.00  
Background Correction OFF

Ratio = (A[260.00])/(A[280.00])

## Analysis

Collection time 2/4/2014 11:40:05 AM

| Sample   | A[260] | A[280] | Ratio  |
|----------|--------|--------|--------|
| Static 1 | 0.0729 | 0.0353 | 2.0661 |

## RNA - DNA Report

Report time 3/10/2014 09:07:44 AM  
Batch name C:\Documents and  
Settings\vbhar002\Desktop\3\_10\_14\_SR\_AV.BDN  
Application RNA - DNA Estimation 3.00(184)  
Operator

## Instrument Settings

Instrument Cary 300  
Instrument version no. 9.00  
Ordinate Mode Abs  
SBW (nm) 2.0  
Ave Time (sec) 1.000  
Beam mode Double auto select  
Beam interchange Normal  
Replicates OFF  
Wavelength 1 (nm) 260.00  
Wavelength 2 (nm) 280.00  
Background Correction OFF

Ratio = (A[260.00])/(A[280.00])

## Analysis

Collection time 3/10/2014 09:07:44 AM

| Sample | A[260] | A[280] | Ratio  |
|--------|--------|--------|--------|
| Flex   | 0.0703 | 0.0353 | 1.9915 |

# Flow RNA - DNA Report

Report time 4/5/2014 01:04:15 PM  
Batch name C:\Documents and  
Settings\vbhar002\Desktop\Flow\_4514.BDN  
Application RNA - DNA Estimation 3.00(184)  
Operator

## Instrument Settings

Instrument Cary 300  
Instrument version no. 9.00  
Ordinate Mode Abs  
SBW (nm) 2.0  
Ave Time (sec) 1.000  
Beam mode Double auto select  
Beam interchange Normal  
Replicates OFF  
Wavelength 1 (nm) 260.00  
Wavelength 2 (nm) 280.00  
Background Correction OFF

Ratio = (A[260.00]) / (A[280.00])

## Analysis

Collection time 4/5/2014 01:04:15 PM

| Sample   | A[260] | A[280] | Ratio  |
|----------|--------|--------|--------|
| Sample 1 | 0.0881 | 0.0466 | 1.8909 |

# Flex-Flow RNA - DNA Report

Report time 5/15/2014 03:44:12 PM  
Batch name C:\Documents and  
Settings\vbhar002\Desktop\F-F\_SR\_AV.BDN  
Application RNA - DNA Estimation 3.00(184)  
Operator

## Instrument Settings

Instrument Cary 300  
Instrument version no. 9.00  
Ordinate Mode Abs  
SBW (nm) 2.0  
Ave Time (sec) 1.000  
Beam mode Double auto select  
Beam interchange Normal  
Replicates OFF  
Wavelength 1 (nm) 260.00  
Wavelength 2 (nm) 280.00  
Background Correction OFF

Ratio = (A[260.00]) / (A[280.00])

## Analysis

Collection time 5/15/2014 03:44:12 PM

| Sample   | A[260] | A[280] | Ratio  |
|----------|--------|--------|--------|
| Sample 1 | 0.0637 | 0.0302 | 2.1125 |

# PHV

# RNA - DNA Report

Report time 6/19/2015 11:49:30 AM  
Batch name C:\Documents and  
Settings\vbhar002\Desktop\PHV\_61915\_SR.BDN  
Application RNA - DNA Estimation 3.00(184)  
Operator

## Instrument Settings

Instrument Cary 300  
Instrument version no. 9.00  
Ordinate Mode Abs  
SBW (nm) 2.0  
Ave Time (sec) 1.000  
Beam mode Double auto select  
Beam interchange Normal  
Replicates OFF  
Wavelength 1 (nm) 260.00  
Wavelength 2 (nm) 280.00  
Background Correction OFF

Ratio = (A[260.00])/(A[280.00])

## Analysis

Collection time 6/19/2015 11:19:30 AM

| Sample  | A[260] | A[280] | Ratio  |
|---------|--------|--------|--------|
| PHV 111 | 0.0500 | 0.0259 | 1.9307 |
