# Supplementary material for: Differentiation and Distribution of Marrow Stem Cells in Flex-Flow Environments Demonstrate Support of the Valvular Phenotype
Source: PubMed Central journal article supplement (PMC4633293; doi:10.1371/journal.pone.0141802), 2015-11-04

RT PCR Melt curve

# Static

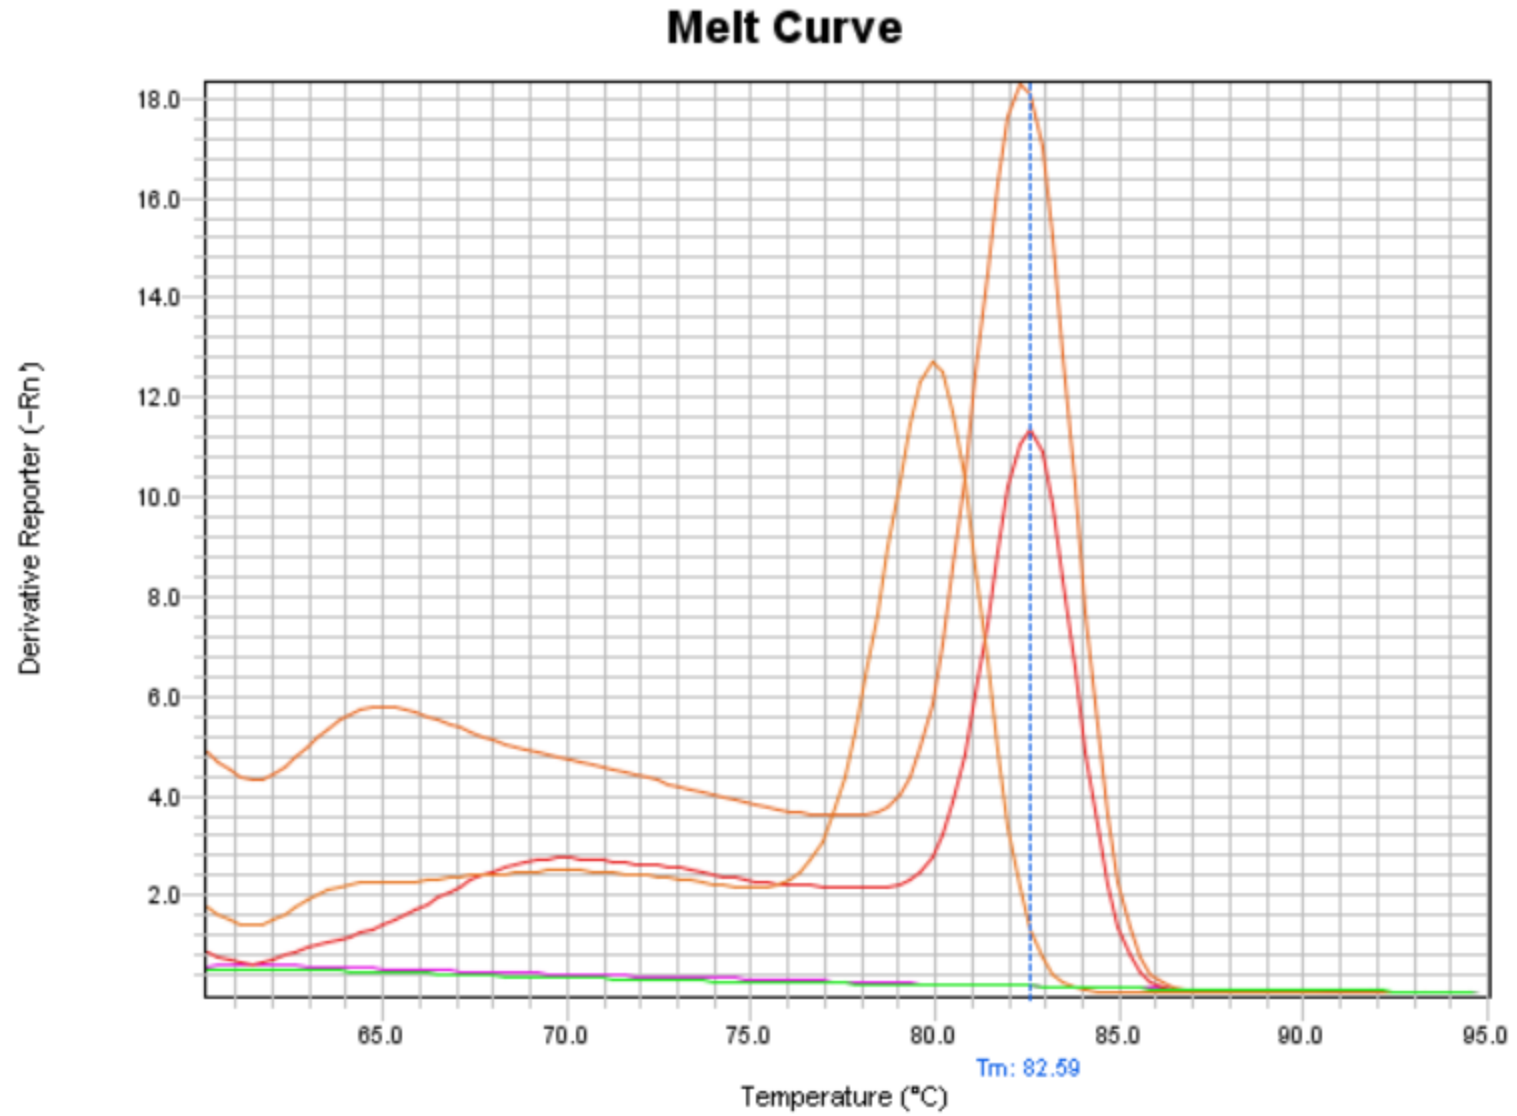

# Flow

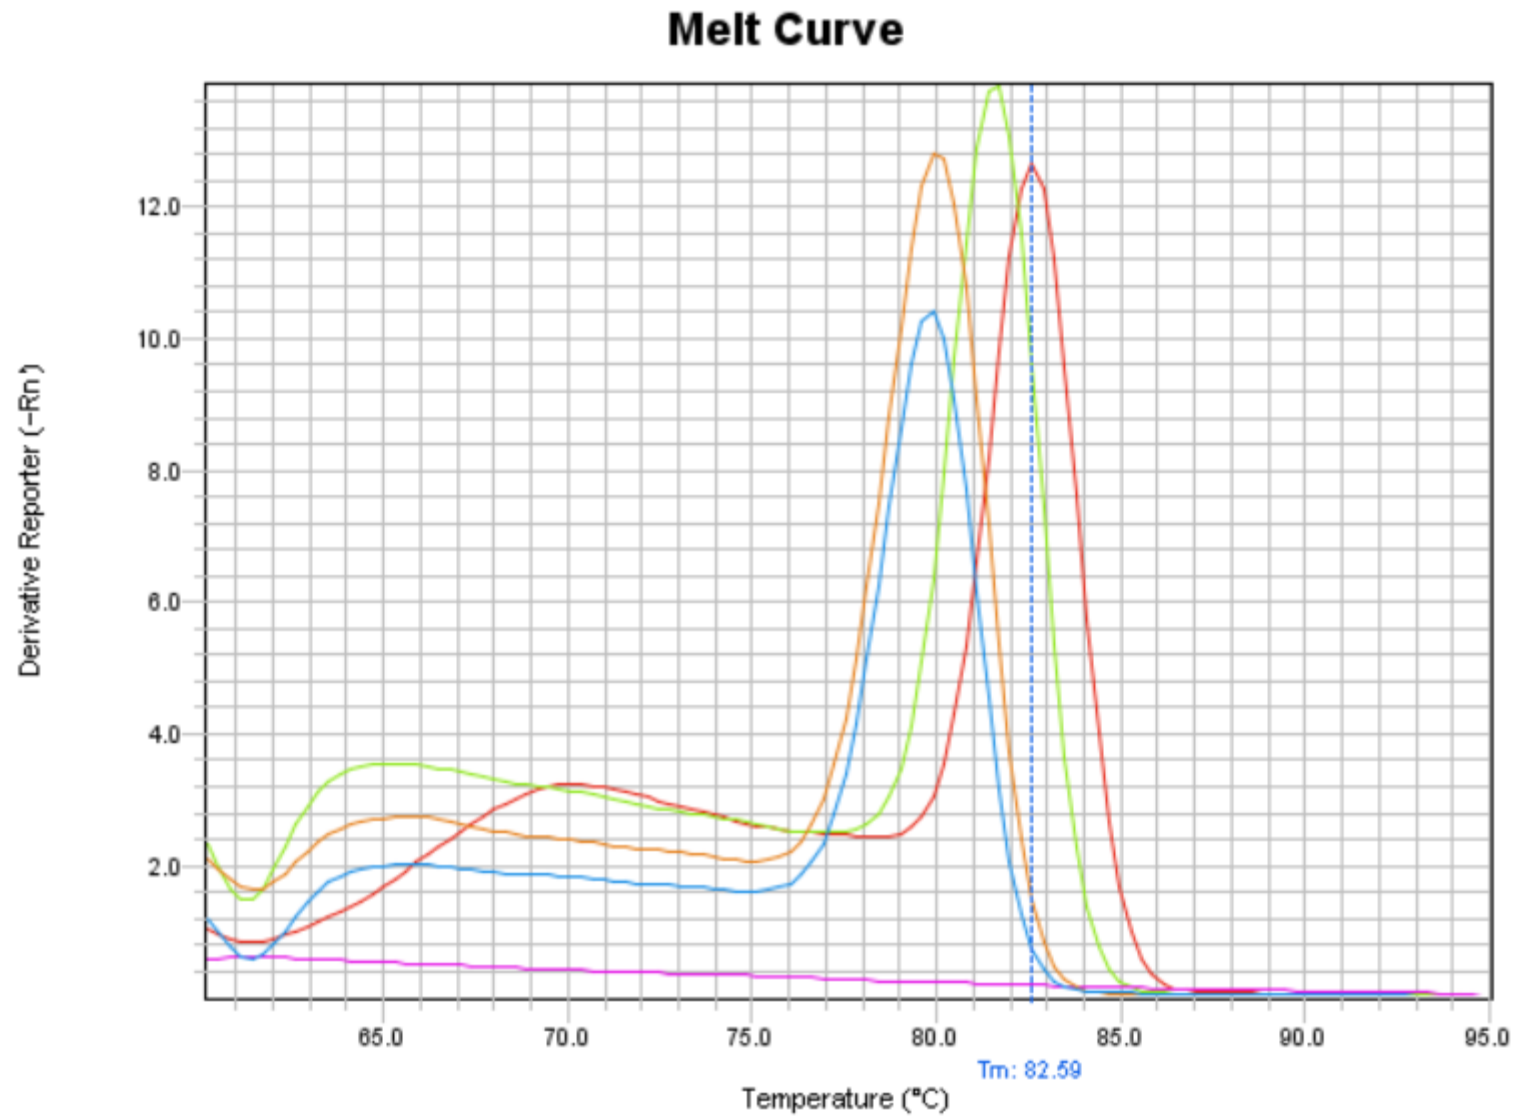

# Flex

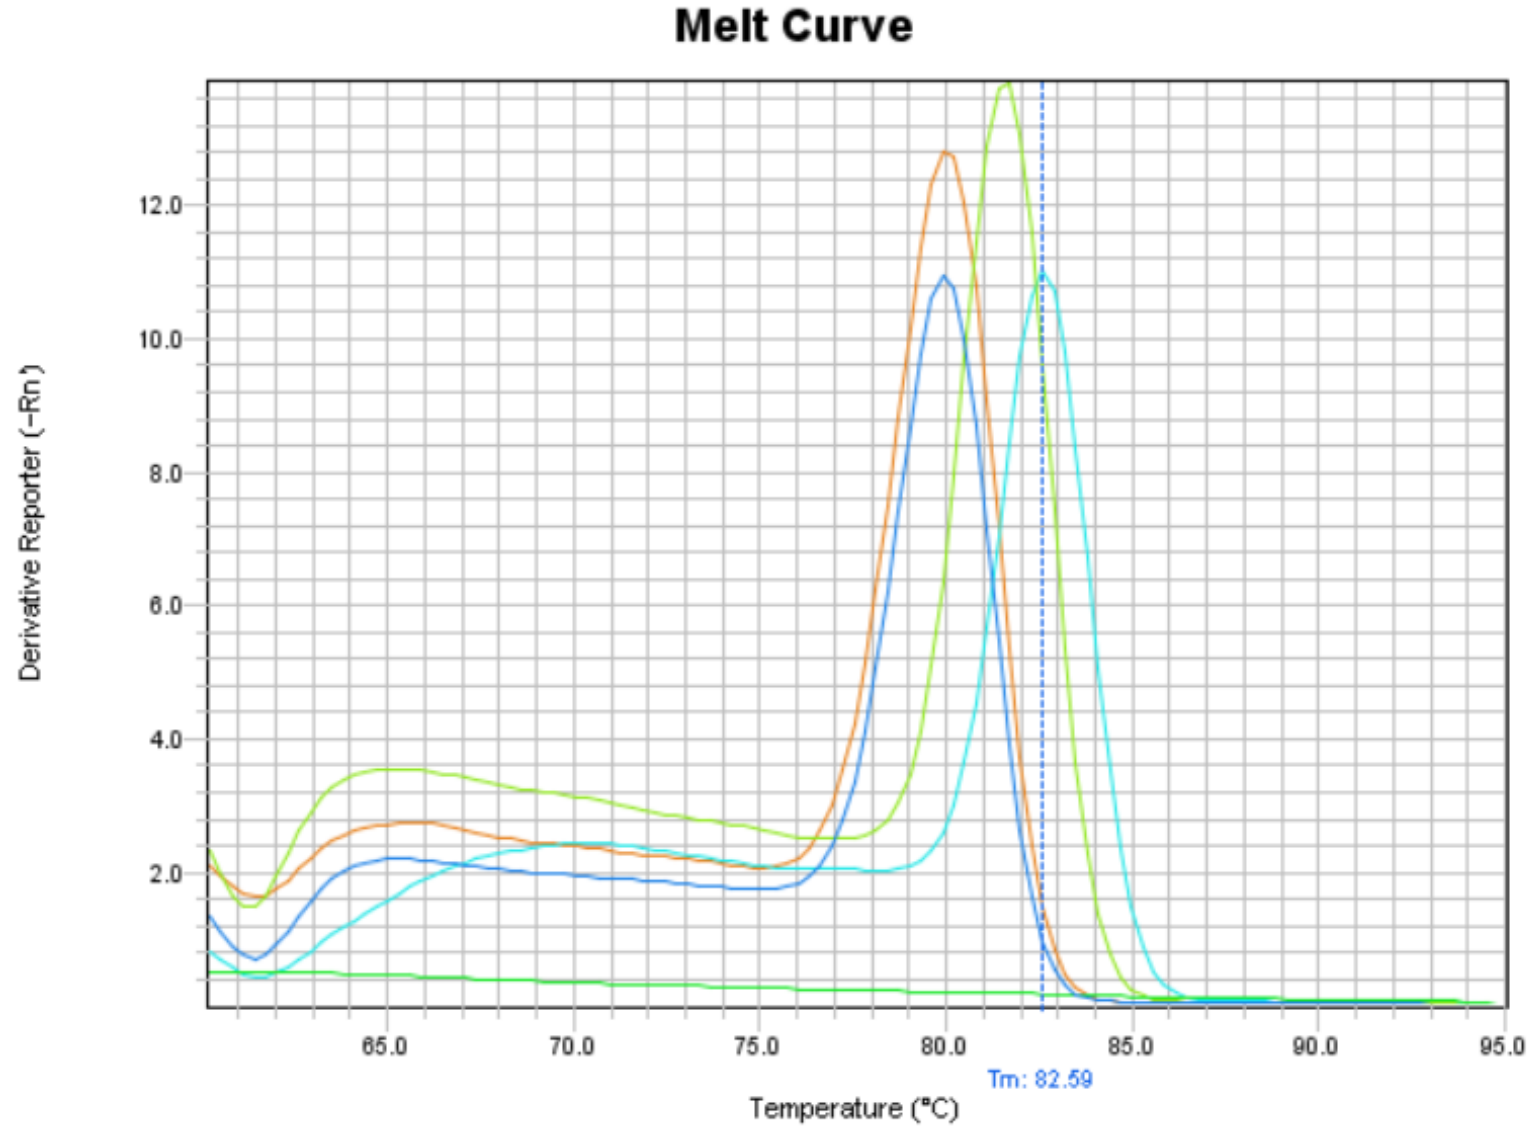

# Flex-Flow

## Melt Curve

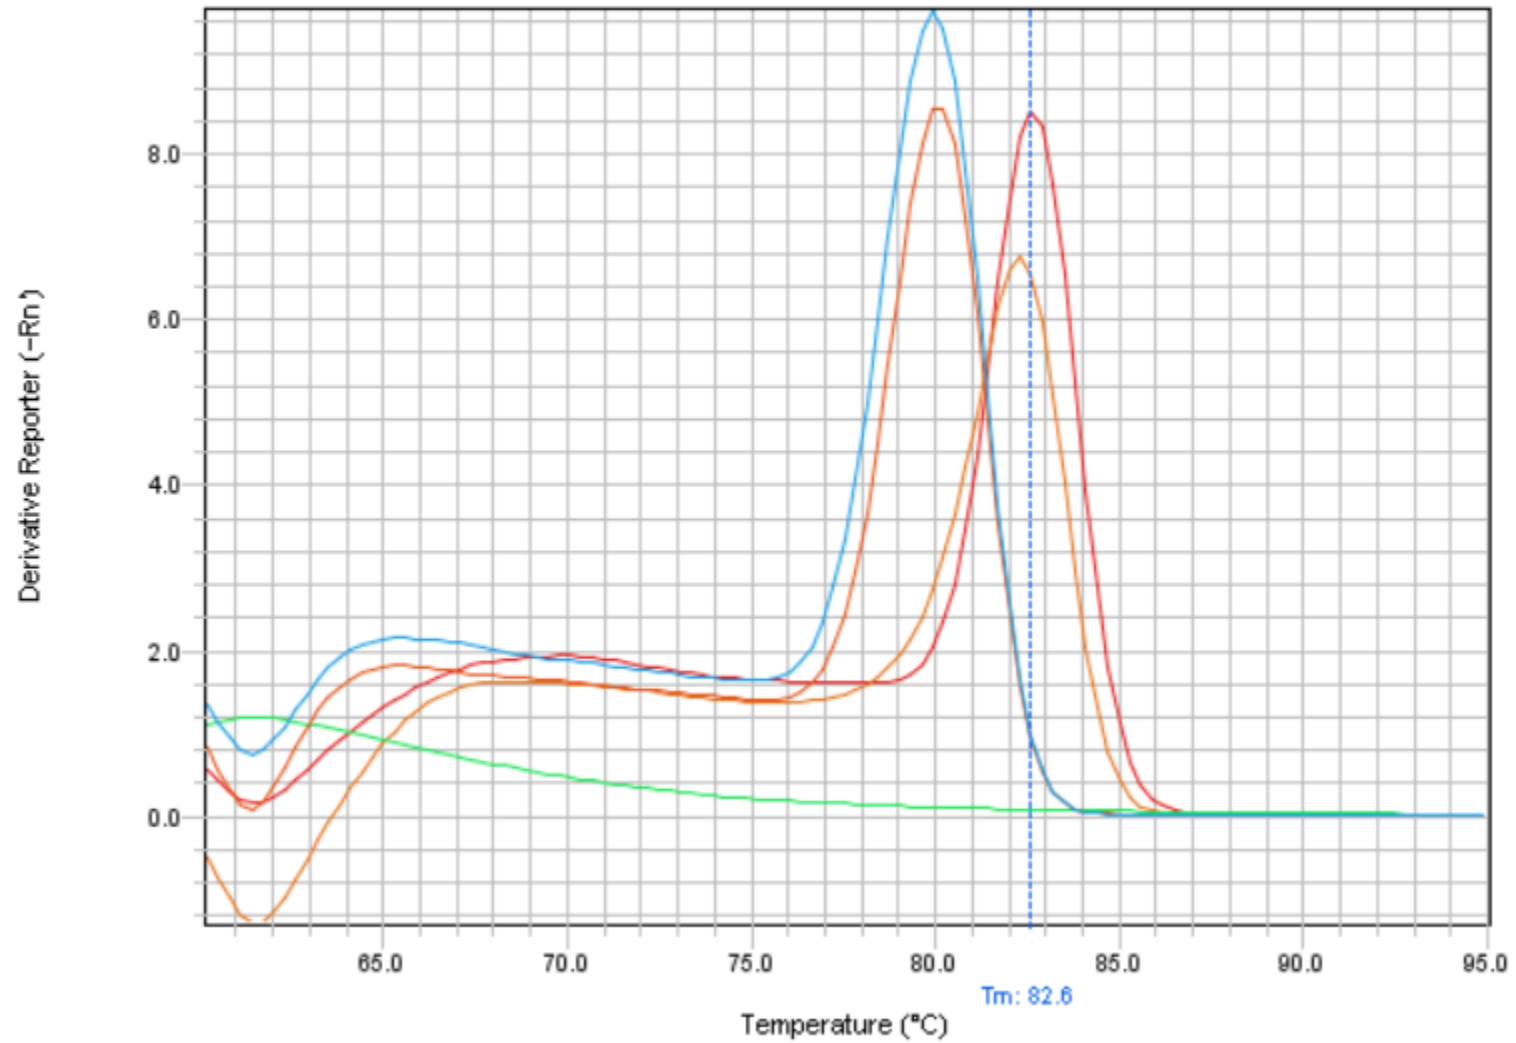

# PHV

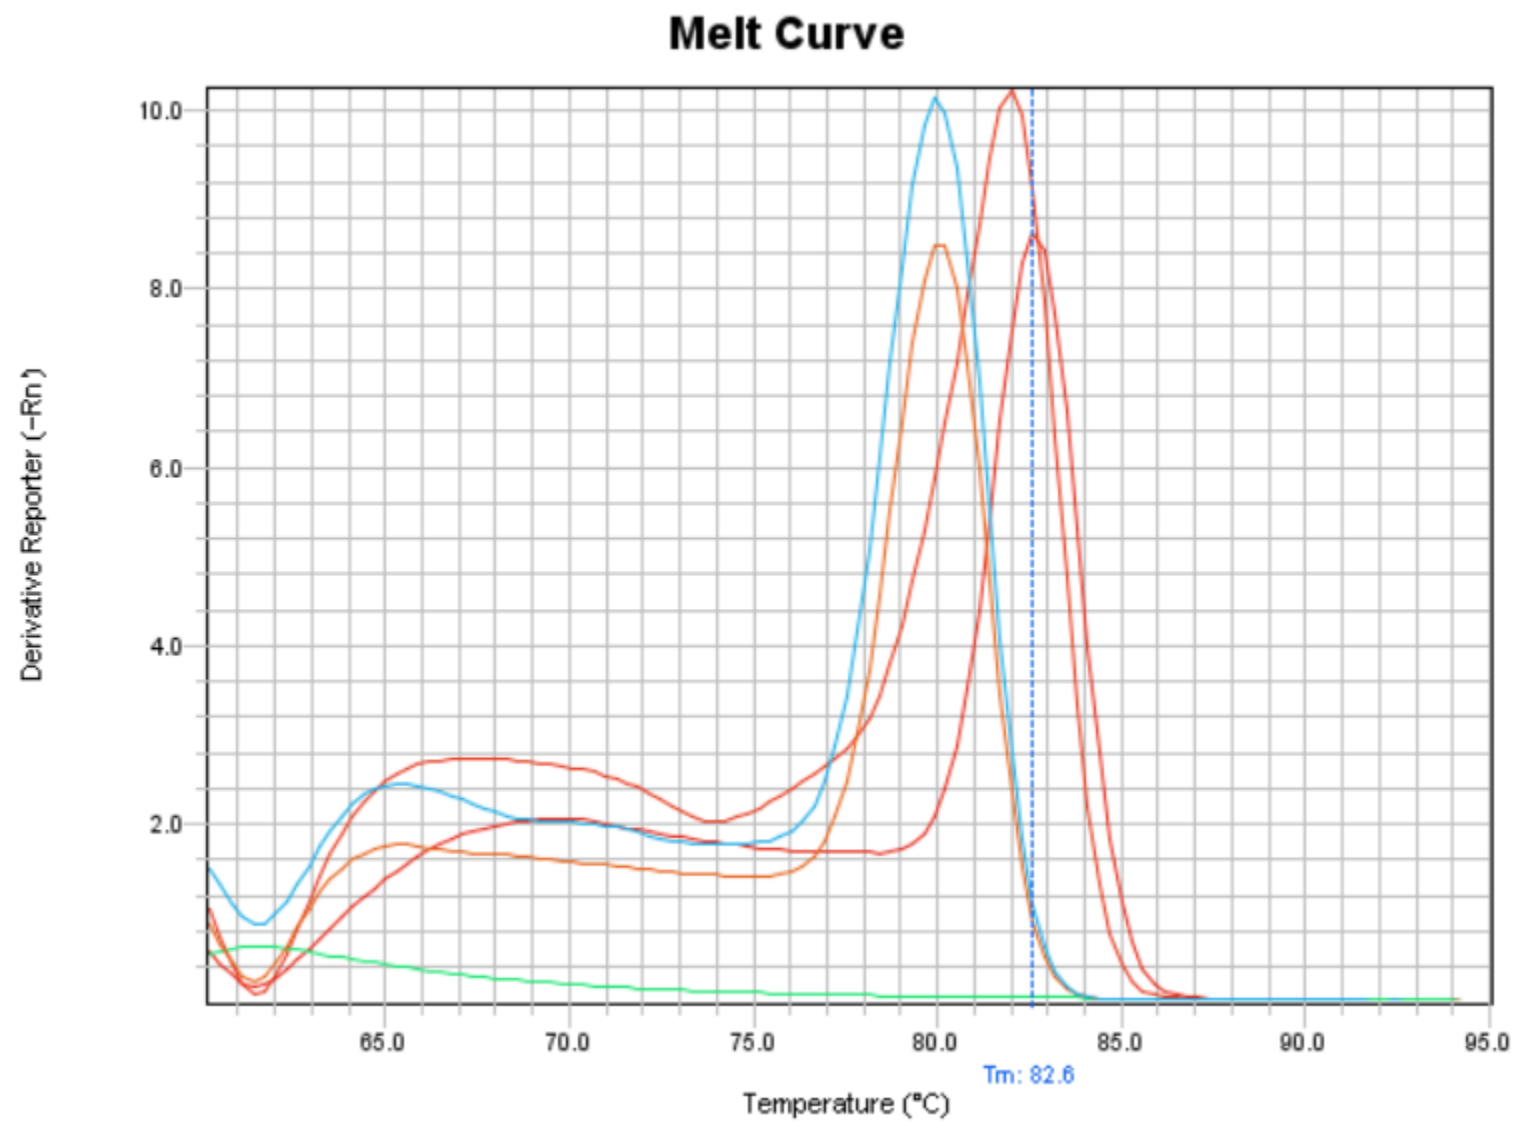

Supplement: pone.0141802.s004.pdf [file pone.0141802.s004.pdf]
